# Supplementary material for: Computational Lipidology: Predicting Lipoprotein Density Profiles in Human Blood Plasma
Source: PLOS journal article supplement (doi:10.1371/journal.pcbi.1000079), 2008-05-22
Supplement: S1 (10.1371/journal.pcbi.1000079.s001) [file journal.pcbi.1000079.s001]

## Supplement S1. Calculating the Number of Phospholipids

The core volume  $V_c$  of a lipoprotein particle results from the number of neutral lipids  $n_i$  ( $i = C, T$ ) and their molecular volume  $mv_i$  (in ml/mol) divided by the Avogadro constant  $L$  ( $6.022 \cdot 10^{23} \text{ mol}^{-1}$ ) and is given as  $\text{nm}^3$  per particle.

$$V_c = \sum_{i=\{C,T\}} n_i mv_i \cdot \frac{10^{21}}{L} \quad (1)$$

From the core volume the core radius  $r_c$  (in nm) can be calculated as follows. The surface radius  $r_s$  is assumed to have a fixed volume of  $2nm$  [1]

$$r_c = \sqrt[3]{\frac{3}{4} \cdot \frac{V_c}{\pi}} \quad (2)$$

The surface volume  $V_s$  (in ml/mol) is then determined as:

$$V_s = 4 \cdot \pi \cdot r_c^2 \cdot r_s \cdot \frac{L}{10^{21}} \quad (3)$$

The surface of a lipoprotein is predominantly occupied by apolipoproteins and phospholipids. Thus, the surface volume occupied by phospholipids  $V_P$  is estimated as the difference of the total surface volume  $V_s$  and the surface volume already filled with apolipoproteins  $V_{AP}$ .

$$V_{AP} = \sum_{i=\{A,B,E\}} n_i mv_i \quad (4)$$

$$V_P = V_s - V_{AP} \quad (5)$$

Subsequently, the number of phospholipid molecules  $n_P$  is calculated.

$$n_P = \frac{V_P}{mv_P} \quad (6)$$

In the end, the density is recalculated by adding the weight and the volume for the phospholipid content.

$$d = \frac{\sum n_i mw_i + n_P mw_P}{\sum n_i mv_i + n_P mv_P} \quad (7)$$

## References

1. Miller AL, Smith LC (1973) Activation of lipoprotein lipase by apolipoprotein glutamic acid. Formation of a stable surface film. J Biol Chem 248:3359–3362.
