# Supplementary material for: Computational Lipidology: Predicting Lipoprotein Density Profiles in Human Blood Plasma
Source: PLOS journal article supplement (doi:10.1371/journal.pcbi.1000079), 2008-05-22
Supplement: S2 (10.1371/journal.pcbi.1000079.s002) [file journal.pcbi.1000079.s002]

301 Moved Permanently

# Moved Permanently

The document has moved here.

---

Apache Server at www.ploscompbiol.org Port 80
