# Supplementary material for: Computational Lipidology: Predicting Lipoprotein Density Profiles in Human Blood Plasma
Source: PLOS journal article supplement (doi:10.1371/journal.pcbi.1000079), 2008-05-22
Supplement: S2 (10.1371/journal.pcbi.1000079.s002) [file journal.pcbi.1000079.s002]

## Supplement S2. Description of the Kinetic Processes Defined in the Model

| Lp Species | Process                            | Description                                                                                                              |
|------------|------------------------------------|--------------------------------------------------------------------------------------------------------------------------|
| A-particle | <i>Death and Birth</i>             |                                                                                                                          |
|            | CreateA                            | Synthesis and secretion of lipid-poor apoA-I molecules by the liver                                                      |
|            | DestroyA                           | Receptor-mediated particle uptake, e.g. by the HDL receptor (HDLR)                                                       |
|            | <i>Lipoprotein-Tissue Exchange</i> |                                                                                                                          |
|            | Influx                             | Peripheral cholesterol is transferred to plasma HDL particles mediated by e.g. ABCA1                                     |
|            | EffluxA                            | Selective uptake of cholesteryl ester from HDL facilitated by e.g. SRB1                                                  |
|            | <i>Inter-Lipoprotein Exchange</i>  |                                                                                                                          |
|            | ExchangeC <sub>A</sub>             | Cholesteryl ester is transferred from HDL to the non-lipid bound exchange protein ( <i>CETP</i> (0))                     |
|            | ExchangeT <sub>A</sub>             | <i>CETP</i> (T) releases its triglyceride content to HDL                                                                 |
|            | TransferA                          | Remodeling of apoA containing HDL particles by losing and                                                                |
|            | UptakeA                            | receiving a single molecule of apoA-I from the plasma pool                                                               |
|            | TransferF <sub>A</sub>             | Delivery of apolipoproteins from HDL to newly synthesized VLDL via a free plasma pool                                    |
|            | UptakeF <sub>A</sub>               | Uptake of apolipoproteins by HDL particles                                                                               |
|            | <i>Enzymatic Conversion</i>        |                                                                                                                          |
|            | HydrolyzeA                         | Hydrolysis of triglycerides (release of free fatty acids) by the action of Hepatic Lipase (HL)                           |
| B-particle | <i>Death and Birth</i>             |                                                                                                                          |
|            | CreateB                            | Synthesis and secretion of VLDL by the liver                                                                             |
|            | DestroyB                           | Receptor-mediated particle uptake, e.g. by the LDL receptor (LDLR)                                                       |
|            | <i>Lipoprotein-Tissue Exchange</i> |                                                                                                                          |
|            | EffluxB                            | Selective uptake of cholesteryl ester from, e.g. LDL, facilitated by e.g. SRB1                                           |
|            | <i>Inter-Lipoprotein Exchange</i>  |                                                                                                                          |
|            | ExchangeC <sub>B</sub>             | <i>CETP</i> (C) releases its cholesteryl ester to apoB-containing lipoproteins                                           |
|            | ExchangeT <sub>B1</sub>            | Triglyceride from apoB-containing lipoproteins is transferred to the non-lipid bound exchange protein ( <i>CETP</i> (0)) |
|            | ExchangeT <sub>B2</sub>            | <i>CETP</i> (T) releases its triglyceride content to apoB-containing lipoproteins                                        |
|            | TransferF <sub>B</sub>             | Release of apolipoproteins during the delipidation cascade of apoB particles                                             |
|            | UptakeF <sub>B</sub>               | Uptake of further apolipoprotein molecules, e.g. of apoE by newly synthesized VLDL                                       |
|            | <i>Enzymatic Conversion</i>        |                                                                                                                          |
|            | HydrolyzeB                         | Hydrolysis of triglycerides (release of free fatty acids) by the action of Lipoprotein Lipase (LPL)                      |

Abbreviations: *CETP* (Cholesteryl ester transfer protein), LPL (lipoprotein lipase), HL (hepatic lipase), ABCA1 (ATP-binding cassette transporter class A type 1), SRB1 (Scavenger receptor B1)
